# Supplementary material for: COVID-19 Outcomes Among Persons Living With or Without Diagnosed HIV Infection in New York State
Source: PubMed Central journal article supplement (PMC7859843; doi:10.1001/jamanetworkopen.2020.37069), 2021-02-03
Supplement: jamanetwopen-e2037069-s001.pdf [file jamanetwopen-e2037069-s001.pdf]

## Supplementary Online Content

Tesoriero JM, Swain CAE, Pierce JL, et al. COVID-19 outcomes among persons living with or without diagnosed HIV infection in New York State. *JAMA Netw Open*. 2021;4(2):e2037069. doi:10.1001/jamanetworkopen.2020.37069

**eTable 1.** Age- and Sex-Standardized Rate Ratios for COVID-19 Diagnosis, Hospitalization, and In-Hospital Death, Comparing Persons Living With and Without Diagnosed HIV Infection, by Region—New York State, March 1-June 7, 2020

**eTable 2.** COVID-19 Diagnosis, Hospitalization, and In-Hospital Death per 1000, Among Persons Living With and Without Diagnosed HIV Infection—New York State (NYS), March 1-June 7, 2020

This supplementary material has been provided by the authors to give readers additional information about their work.

**eTable 1.** Age- and Sex-Standardized Rate Ratios for COVID-19 Diagnosis, Hospitalization, and In-Hospital Death, Comparing Persons Living With and Without Diagnosed HIV Infection, by Region—New York State, March 1-June 7, 2020 <sup>a</sup>

|                                              | <b>Diagnosed with COVID-19</b> | <b>Hospitalized with COVID-19</b> | <b>In-hospital Death with COVID-19</b> |
|----------------------------------------------|--------------------------------|-----------------------------------|----------------------------------------|
|                                              | <b>Standardized Rate Ratio</b> | <b>Standardized Rate Ratio</b>    | <b>Standardized Rate Ratio</b>         |
|                                              | <b>(95% CI)</b>                | <b>(95% CI)</b>                   | <b>(95% CI)</b>                        |
| <b>Rates per 1,000 population</b>            |                                |                                   |                                        |
| Long Island                                  | 1.33 (1.17-1.50)               | 1.64 (1.20-2.08)                  | 1.80 (0.82-2.79)                       |
| Mid-Hudson                                   | 1.14 (1.00-1.30)               | 1.89 (1.34-2.43)                  | 1.23 (0.15-2.31)                       |
| New York City                                | 0.88 (0.85-0.92)               | 1.32 (1.23-1.41)                  | 1.20 (1.03-1.37)                       |
| Rest of New York State (ROS)                 | 1.81 (1.43-2.19)               | 2.91 (1.77-4.06)                  | 1.85 (0.00-3.95)                       |
| <b>Rates per previous stage <sup>b</sup></b> |                                |                                   |                                        |
| Long Island                                  | 1.34 (1.17-1.50)               | 1.27 (0.93-1.62)                  | 1.09 (0.50-1.68)                       |
| Mid-Hudson                                   | 1.15 (1.00-1.30)               | 1.50 (1.07-1.94)                  | 0.68 (0.08-1.28)                       |
| New York City                                | 0.90 (0.86-0.93)               | 1.47 (1.37-1.58)                  | 0.96 (0.83-1.10)                       |
| Rest of New York State (ROS)                 | 1.81 (1.44-2.19)               | 1.80 (1.09-2.50)                  | 0.81 (0.00-1.72)                       |

- a. Persons diagnosed with COVID-19 through June 7, hospitalized through June 15
- b. Denominator for “Diagnosed with COVID-19” is population, for “Hospitalized with COVID-19” is persons diagnosed with COVID-19, for “In-hospital Death with COVID-19” is persons hospitalized with COVID-19.

**eTable 2.** COVID-19 Diagnosis, Hospitalization, and In-Hospital Death per 1000, Among Persons Living With and Without Diagnosed HIV Infection—New York State (NYS), March 1-June 7, 2020 <sup>a</sup>

|                                         | Population Size    |            | Diagnosed with COVID-19 |            |           |            | Hospitalized with COVID-19 |     |                  |           |                  | In-hospital Death with COVID-19 |     |                  |           |                  |                     |
|-----------------------------------------|--------------------|------------|-------------------------|------------|-----------|------------|----------------------------|-----|------------------|-----------|------------------|---------------------------------|-----|------------------|-----------|------------------|---------------------|
|                                         | PLWDH <sup>b</sup> | non-PLWDH  | PLWDH                   |            | non-PLWDH |            | PLWDH                      |     |                  | non-PLWDH |                  | PLWDH                           |     |                  | non-PLWDH |                  |                     |
|                                         |                    |            | n                       | Rate/1,000 | n         | Rate/1,000 | Rate Ratio (95% CI)        | n   | Rate/1,000 diag. | n         | Rate/1,000 diag. | Rate Ratio (95% CI)             | n   | Rate/1,000 hosp. | n         | Rate/1,000 hosp. | Rate Ratio (95% CI) |
| <b>Age in Years <sup>c</sup></b>        |                    |            |                         |            |           |            |                            |     |                  |           |                  |                                 |     |                  |           |                  |                     |
| <40                                     | 27,154             | 9,902,345  | 492                     | 18.12      | 121,871   | 12.31      | 1.47 (1.35-1.61)           | 62  | 126.02           | 7,346     | 60.28            | 2.09 (1.63-2.68)                | 4   | 64.52            | 254       | 34.58            | 1.87 (0.69-5.01)    |
| 40-<60                                  | 53,632             | 4,925,972  | 1,400                   | 26.10      | 133,095   | 27.02      | 0.97 (0.92-1.02)           | 356 | 254.29           | 15,925    | 119.65           | 2.13 (1.91-2.36)                | 67  | 188.20           | 1,952     | 122.57           | 1.54 (1.20-1.96)    |
| 60+                                     | 27,274             | 4,517,182  | 1,096                   | 40.18      | 119,291   | 26.41      | 1.52 (1.43-1.62)           | 478 | 436.13           | 38,096    | 319.35           | 1.37 (1.25-1.50)                | 136 | 284.52           | 12,316    | 323.29           | 0.88 (0.74-1.04)    |
| <b>Sex <sup>d</sup></b>                 |                    |            |                         |            |           |            |                            |     |                  |           |                  |                                 |     |                  |           |                  |                     |
| Female                                  | 30,331             | 9,975,384  | 879                     | 28.98      | 182,440   | 18.29      | 1.59 (1.48-1.69)           | 265 | 301.48           | 27,366    | 150.00           | 2.01 (1.78-2.27)                | 66  | 249.06           | 5,802     | 212.01           | 1.18 (0.92-1.50)    |
| Male                                    | 77,731             | 9,370,115  | 2,109                   | 27.13      | 190,537   | 20.33      | 1.33 (1.28-1.39)           | 631 | 299.19           | 33,881    | 177.82           | 1.68 (1.56-1.82)                | 141 | 223.45           | 8,699     | 256.75           | 0.87 (0.74-1.03)    |
| <b>Region of Residence <sup>e</sup></b> |                    |            |                         |            |           |            |                            |     |                  |           |                  |                                 |     |                  |           |                  |                     |
| Long Island                             | 5,709              | 2,827,816  | 252                     | 44.14      | 79,874    | 28.25      | 1.56 (1.38-1.77)           | 53  | 210.32           | 12,113    | 151.65           | 1.39 (1.06-1.82)                | 13  | 245.28           | 2,666     | 220.09           | 1.11 (0.65-1.92)    |
| Mid-Hudson                              | 6,142              | 2,317,635  | 228                     | 37.12      | 61,771    | 26.65      | 1.39 (1.22-1.59)           | 46  | 201.75           | 6,619     | 107.15           | 1.88 (1.41-2.52)                | 5   | 108.70           | 1,089     | 164.53           | 0.67 (0.27-1.59)    |
| New York City                           | 84,284             | 8,252,524  | 2,409                   | 28.58      | 204,903   | 24.83      | 1.15 (1.11-1.20)           | 771 | 320.05           | 38,964    | 190.16           | 1.68 (1.57-1.81)                | 186 | 241.25           | 9,995     | 256.52           | 0.94 (0.81-1.09)    |
| Rest of NYS                             | 11,916             | 5,947,524  | 88                      | 7.39       | 23,395    | 3.93       | 1.88 (1.52-2.32)           | 25  | 284.09           | 3,558     | 152.08           | 1.87 (1.26-2.77)                | 3   | 120.00           | 742       | 208.54           | 0.58 (0.19-1.79)    |
| <b>Total</b>                            | 108,062            | 19,345,499 | 2,988                   | 27.65      | 375,260   | 19.40      | 1.43 (1.38-1.48)           | 896 | 299.87           | 61,371    | 163.54           | 1.83 (1.72-1.96)                | 207 | 231.03           | 14,522    | 236.63           | 0.98 (0.85-1.12)    |

- a. Persons diagnosed with COVID-19 through June 7, hospitalized through June 15.
- b. Persons living with diagnosed HIV infection (PLWDH) as of the end of December 2019, per data as of July 2020. 2 persons had unknown age and 11 were living in NYS as of the end of 2019 but living out of state at COVID-19 diagnosis, classifying them as out of state for “region of residence”.
- c. Age was at diagnosis for those with diagnosed COVID-19. For individuals with diagnosed HIV but not diagnosed COVID-19, age as of 12/31/2019 was used. Individuals under age 18 are included in the “<40” group. Among non-PLWDH, 1,003 diagnosed and 4 hospitalized had unknown age.
- d. Sex at birth was used for PLWDH, sex for non-PLWDH may include current gender identity. Among non-PLWDH, 18 diagnosed and 1 hospitalized had ‘other’ sex; 2,265 diagnosed, 123 hospitalized, and 21 with in-hospital death had unknown sex.
- e. Region of residence was defined as follows: For persons with and without HIV diagnosed with COVID-19, region was defined based on the county of residence at COVID-19 diagnosis. For persons with an HIV diagnosis, but not diagnosed with COVID-19, region was based on the last known county of residence recorded in the HIV surveillance registry as of year-end 2019. Among non-PLWDH, 3,875 diagnosed, 36 hospitalized, and 7 with in-hospital death were out of state residents; 1,442 diagnosed, 81 hospitalized, and 23 with in-hospital death had ‘unknown’ region of residence.
